# Supplementary material for: Association between Parents’ Perceptions of Preschool Children’s Weight, Feeding Practices and Children’s Dietary Patterns: A Cross-Sectional Study in China
Source: MDPI journal article supplement (doi:10.3390/nu13113767), 2021-10-25
Supplement: s1 [file s1]

**Table S1.** Linear regression relationships between parental weight perceptions and children's dietary patterns among different ZBMI weight status of children

| Weight Perceptions                             | Traditional Dietary Pattern |               |              | Snacking Dietary Pattern |              |              |
|------------------------------------------------|-----------------------------|---------------|--------------|--------------------------|--------------|--------------|
|                                                | $\hat{\beta}$               | t             | P            | $\hat{\beta}$            | t            | P            |
| <b>Underweight</b>                             |                             |               |              |                          |              |              |
| <b>Concern about child becoming overweight</b> |                             |               |              |                          |              |              |
| Unconcerned                                    | Ref                         | -             | -            | Ref                      | -            | -            |
| Concerned                                      | -0.045                      | -0.653        | 0.514        | <b>0.187</b>             | <b>2.711</b> | <b>0.007</b> |
| <b>Satisfaction with child body weight</b>     |                             |               |              |                          |              |              |
| Same                                           | Ref                         | -             | -            | Ref                      | -            | -            |
| Wish thinner                                   | <b>-0.146</b>               | <b>-2.013</b> | <b>0.045</b> | <b>0.162</b>             | <b>2.195</b> | <b>0.029</b> |
| Wish heavier                                   | <b>-0.189</b>               | <b>-2.619</b> | <b>0.009</b> | -0.024                   | -0.322       | 0.648        |
| <b>Misperception of child body weight</b>      |                             |               |              |                          |              |              |
| Correct                                        | Ref                         | -             | -            | Ref                      | -            | -            |
| Overestimate                                   | <b>0.156</b>                | <b>2.343</b>  | <b>0.020</b> | 0.041                    | 0.603        | 0.547        |
| <b>Normal weight</b>                           |                             |               |              |                          |              |              |
| <b>Concern about child becoming overweight</b> |                             |               |              |                          |              |              |
| Unconcerned                                    | Ref                         | -             | -            | Ref                      | -            | -            |
| concerned                                      | 0.041                       | 1.277         | 0.220        | 0.015                    | 0.453        | 0.650        |
| <b>Satisfaction with child body weight</b>     |                             |               |              |                          |              |              |
| Same                                           | Ref                         | -             | -            | Ref                      | -            | -            |
| Wish thinner                                   | -0.024                      | -0.660        | 0.509        | 0.040                    | 1.099        | 0.272        |
| Wish heavier                                   | -0.064                      | -1.765        | 0.078        | 0.040                    | 1.110        | 0.267        |
| <b>Misperception of child body weight</b>      |                             |               |              |                          |              |              |
| Correct                                        | Ref                         | -             | -            | Ref                      | -            | -            |
| Overestimate                                   | 0.035                       | 1.043         | 0.297        | 0.026                    | 0.786        | 0.432        |
| Underestimate                                  | -0.051                      | -1.535        | 0.125        | -0.029                   | -0.870       | 0.385        |
| <b>Overweight/Obese</b>                        |                             |               |              |                          |              |              |
| <b>Concern about child becoming overweight</b> |                             |               |              |                          |              |              |
| Unconcerned                                    | Ref                         | -             | -            | Ref                      | -            | -            |
| Concerned                                      | -0.056                      | -1.047        | 0.296        | 0.079                    | 1.492        | 0.137        |
| <b>Satisfaction with child body weight</b>     |                             |               |              |                          |              |              |
| Same                                           | Ref                         | -             | -            | Ref                      | -            | -            |
| Wish thinner                                   | -0.067                      | -1.124        | 0.262        | 0.003                    | 0.507        | 0.955        |
| Wish heavier                                   | 0.002                       | 0.026         | 0.980        | -0.078                   | -1.333       | 0.183        |
| <b>Misperception of child body weight</b>      |                             |               |              |                          |              |              |
| Correct                                        | Ref                         | -             | -            | Ref                      | -            | -            |
| Underestimate                                  | 0.002                       | 0.034         | 0.973        | 0.073                    | 1.358        | 0.173        |

$\hat{\beta}$ , Standardized Regression coefficients.

Regression model with adjustments of child gender, age, only child, parental role and parental education.

**Table S2.** Linear regression relationships between parental weight perceptions and caregiver feeding practices among different ZBMI weight status of children

| Weight Percep-<br>tions                        | Restriction   |               |              | Food as Reward |        |       | Pressure to Eat |              |              | Monitoring    |               |              |
|------------------------------------------------|---------------|---------------|--------------|----------------|--------|-------|-----------------|--------------|--------------|---------------|---------------|--------------|
|                                                | $\hat{\beta}$ | t             | P            | $\hat{\beta}$  | t      | P     | $\hat{\beta}$   | t            | P            | $\hat{\beta}$ | t             | P            |
| <b>Underweight</b>                             |               |               |              |                |        |       |                 |              |              |               |               |              |
| <b>Concern about child becoming overweight</b> |               |               |              |                |        |       |                 |              |              |               |               |              |
| Unconcerned                                    | Ref           | -             | -            | Ref            | -      | -     | Ref             | -            | -            | Ref           | -             | -            |
| Concerned                                      | <b>-0.141</b> | <b>-2.011</b> | <b>0.046</b> | -0.080         | -1.144 | 0.254 | -0.075          | -1.082       | 0.280        | <b>-0.152</b> | <b>-2.204</b> | <b>0.029</b> |
| <b>Satisfaction with child body weight</b>     |               |               |              |                |        |       |                 |              |              |               |               |              |
| Same                                           | Ref           | -             | -            | Ref            | -      | -     | Ref             | -            | -            | Ref           | -             | -            |
| Wish thinner                                   | 0.030         | 0.396         | 0.693        | -0.013         | -0.170 | 0.865 | -0.029          | -0.403       | 0.687        | 0.017         | 0.225         | 0.822        |
| Wish heavier                                   | 0.122         | 1.635         | 0.104        | 0.122          | 1.641  | 0.102 | <b>0.250</b>    | <b>3.506</b> | <b>0.001</b> | 0.118         | 1.603         | 0.110        |
| <b>Misperception of child body weight</b>      |               |               |              |                |        |       |                 |              |              |               |               |              |
| Correct                                        | Ref           | -             | -            | Ref            | -      | -     | Ref             | -            | -            | Ref           | -             | -            |
| Overestimate                                   | -0.103        | -1.507        | 0.133        | -0.089         | -1.297 | 0.196 | -0.127          | -1.893       | 0.060        | -0.077        | -1.143        | 0.254        |
| <b>Normal weight</b>                           |               |               |              |                |        |       |                 |              |              |               |               |              |
| <b>Concern about child becoming overweight</b> |               |               |              |                |        |       |                 |              |              |               |               |              |
| Unconcerned                                    | Ref           | -             | -            | Ref            | -      | -     | Ref             | -            | -            | Ref           | -             | -            |
| Concerned                                      | <b>0.071</b>  | <b>2.138</b>  | <b>0.033</b> | 0.001          | 0.037  | 0.971 | 0.015           | 0.454        | 0.650        | 0.018         | 0.529         | 0.597        |
| <b>Satisfaction with child body weight</b>     |               |               |              |                |        |       |                 |              |              |               |               |              |
| Same                                           | Ref           | -             | -            | Ref            | -      | -     | Ref             | -            | -            | Ref           | -             | -            |
| Wish thinner                                   | -0.003        | -0.082        | 0.935        | -0.008         | -0.231 | 0.817 | -0.043          | -1.208       | 0.227        | 0.006         | 0.166         | 0.868        |
| Wish heavier                                   | -0.061        | -1.669        | 0.095        | 0.012          | 0.321  | 0.748 | <b>0.115</b>    | <b>3.227</b> | <b>0.001</b> | -0.006        | -0.173        | 0.863        |
| <b>Misperception of child body weight</b>      |               |               |              |                |        |       |                 |              |              |               |               |              |
| Correct                                        | Ref           | -             | -            | Ref            | -      | -     | Ref             | -            | -            | Ref           | -             | -            |
| Overestimate                                   | 0.054         | 1.616         | 0.106        | 0.043          | 1.286  | 0.199 | 0.021           | 0.627        | 0.531        | 0.053         | 1.613         | 0.107        |
| Underestimate                                  | -0.053        | -1.600        | 0.110        | 0.023          | 0.678  | 0.498 | <b>0.079</b>    | <b>2.399</b> | <b>0.017</b> | 0.019         | 0.563         | 0.573        |
| <b>Overweight/Obese</b>                        |               |               |              |                |        |       |                 |              |              |               |               |              |
| <b>Concern about child becoming overweight</b> |               |               |              |                |        |       |                 |              |              |               |               |              |
| Unconcerned                                    | Ref           | -             | -            | Ref            | -      | -     | Ref             | -            | -            | Ref           | -             | -            |
| Concerned                                      | 0.027         | 0.499         | 0.618        | -0.064         | -1.194 | 0.233 | -0.075          | -1.416       | 0.158        | -0.016        | -0.301        | 0.763        |
| <b>Satisfaction with child body weight</b>     |               |               |              |                |        |       |                 |              |              |               |               |              |
| Same                                           | Ref           | -             | -            | Ref            | -      | -     | Ref             | -            | -            | Ref           | -             | -            |
| Wish thinner                                   | 0.100         | 1.690         | 0.092        | -0.007         | -0.113 | 0.910 | -0.019          | -0.326       | 0.745        | 0.090         | 1.517         | 0.130        |
| Wish heavier                                   | -0.041        | -0.696        | 0.487        | -0.029         | -0.494 | 0.622 | <b>0.170</b>    | <b>2.940</b> | <b>0.004</b> | 0.069         | 1.183         | 0.238        |
| <b>Misperception of child body weight</b>      |               |               |              |                |        |       |                 |              |              |               |               |              |
| Correct                                        | Ref           | -             | -            | Ref            | -      | -     | Ref             | -            | -            | Ref           | -             | -            |
| Underestimate                                  | <b>-0.108</b> | <b>-2.003</b> | <b>0.046</b> | 0.025          | 0.468  | 0.640 | <b>0.168</b>    | <b>3.152</b> | <b>0.002</b> | -0.046        | -0.856        | 0.393        |

$\hat{\beta}$ , Standardized Regression coefficients.

Regression model with adjustments of child gender, age, only child, parental role and parental education.

**Table S3.** Linear regression relationships between parental feeding practices and children's dietary patterns among different ZBMI weight status of children

| Weight Perceptions      | Traditional Dietary Pattern |               |              | Snacking Dietary Pattern |               |                  |
|-------------------------|-----------------------------|---------------|--------------|--------------------------|---------------|------------------|
|                         | $\hat{\beta}$               | t             | P            | $\hat{\beta}$            | t             | P                |
| <b>Underweight</b>      |                             |               |              |                          |               |                  |
| Restriction             | 0.044                       | 0.574         | 0.567        | <b>-0.189</b>            | <b>-2.531</b> | <b>0.012</b>     |
| Food as reward          | -0.001                      | -0.012        | 0.991        | -0.033                   | -0.494        | 0.622            |
| Pressure to eat         | <b>-0.151</b>               | <b>-2.202</b> | <b>0.029</b> | 0.038                    | 0.572         | 0.568            |
| Monitoring              | <b>0.194</b>                | <b>2.542</b>  | <b>0.012</b> | <b>-0.208</b>            | <b>-2.792</b> | <b>0.006</b>     |
| <b>Normal weight</b>    |                             |               |              |                          |               |                  |
| Restriction             | 0.001                       | 0.015         | 0.988        | <b>-0.091</b>            | <b>-2.385</b> | <b>0.017</b>     |
| Food as reward          | <b>-0.072</b>               | <b>-2.083</b> | <b>0.038</b> | -0.041                   | -1.197        | 0.232            |
| Pressure to eat         | 0.009                       | 0.270         | 0.787        | <b>0.090</b>             | <b>2.677</b>  | <b>0.008</b>     |
| Monitoring              | <b>0.104</b>                | <b>2.647</b>  | <b>0.008</b> | <b>-0.143</b>            | <b>-3.745</b> | <b>&lt;0.001</b> |
| <b>Overweight/Obese</b> |                             |               |              |                          |               |                  |
| Restriction             | 0.010                       | 0.145         | 0.885        | <b>-0.221</b>            | <b>-3.527</b> | <b>&lt;0.001</b> |
| Food as reward          | -0.065                      | -1.153        | 0.250        | -0.071                   | -1.330        | 0.185            |
| Pressure to eat         | 0.015                       | 0.271         | 0.787        | 0.060                    | 1.139         | 0.255            |
| Monitoring              | <b>0.154</b>                | <b>2.405</b>  | <b>0.017</b> | -0.106                   | -1.724        | 0.086            |

$\hat{\beta}$ , Standardized Regression coefficients.

Regression model includes restriction, food as reward, pressure to eat and monitoring, plus child gender, age, only child, parental role and parental education.
